# Supplementary material
Source: publisher figshare collection journal article supplement (https://acs.figshare.com/ndownloader/files/3876973)
Supplement: Supplementary file 1 [file 3876973]

## Bioactive hybrid organogels based on miniemulsion synthesis of morphologically complex polymer/surfactant/calcium phosphate nanostructures

Khronghwan Akkarachaneeyakorn, Mei Li, Joe Harris, Sean A. Davis, Stephen Mann\*

Centre for Organized Matter Chemistry and Centre for Protolife Research, School of Chemistry, University of Bristol, Bristol BS8 1TS, UK

### SUPPLEMENTARY INFORMATION

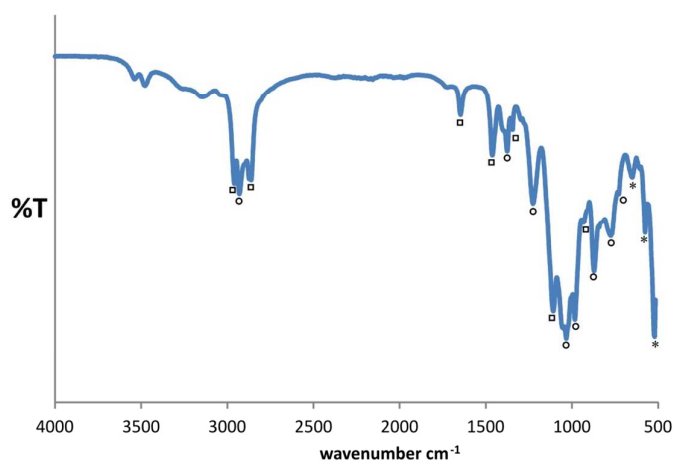

**Figure S1.** FTIR spectrum recorded from a P123/DEHP/calcium phosphate organogel showing absorption bands for P123 (squares), DEHP (circles), and inorganic phosphate (asterisks).

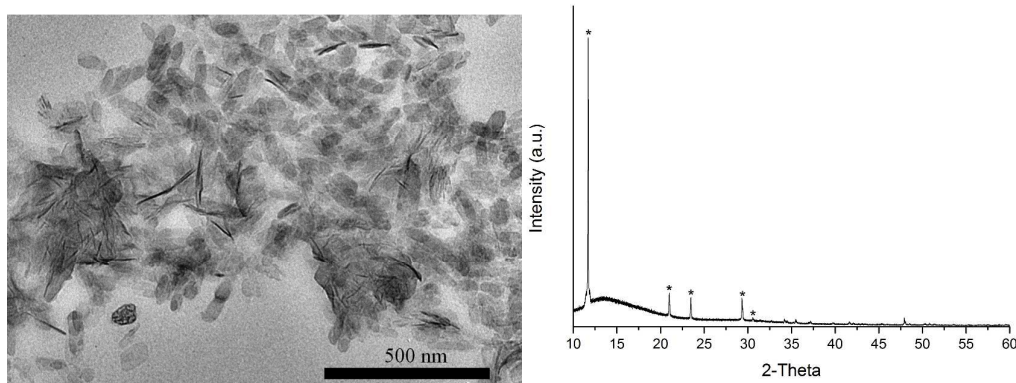

**Figure S2.** (Left) TEM image showing platelet crystals of brushite extracted from the cloudy lower aqueous phase after 2 days. The crystals were typically 60-100 nm and  $37.7 \pm 4.6$  nm in length and width, respectively. (Right) Corresponding PXRD pattern showing brushite reflections for the (0 2 0), (0 2 1), (0 4 0), (0 4 1) and (-2 2 1) planes.

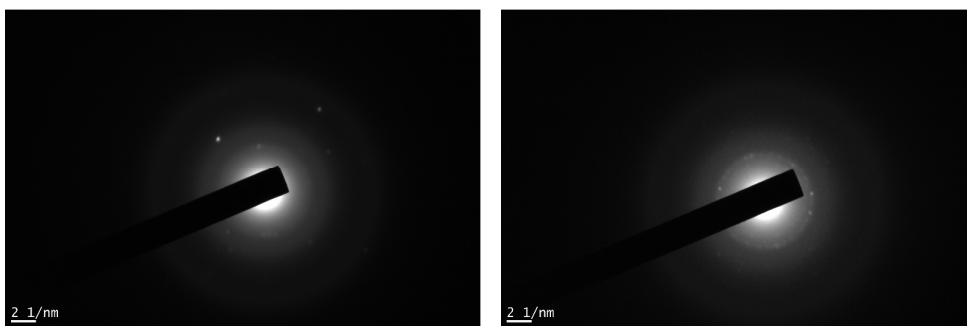

**Figure S3.** Selected area electron diffraction patterns before (left) and after (right) formation of organogel 10 showing an amorphous to brushite transformation during the solvent evaporation step.

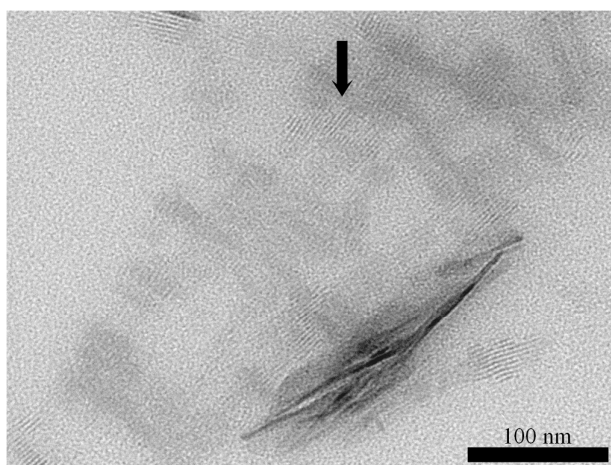

**Figure S4.** TEM image of  $\text{Ca}(\text{DEHP})_2$  mesolamellar phase showing lattice fringes with  $1.1 \pm 0.2$  nm spacing (arrow).

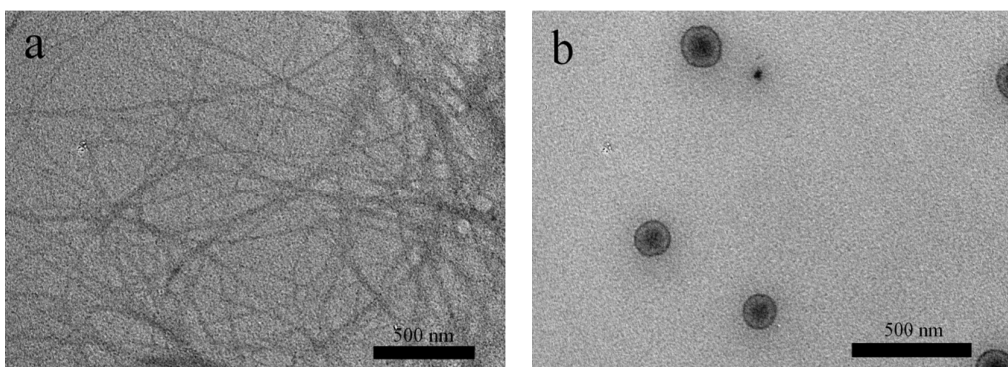

**Figure S5.** TEM images showing calcium phosphate structures obtained from control experiments in the absence of (a)  $\text{Ca}(\text{DEHP})_2$ , and (b) P123.

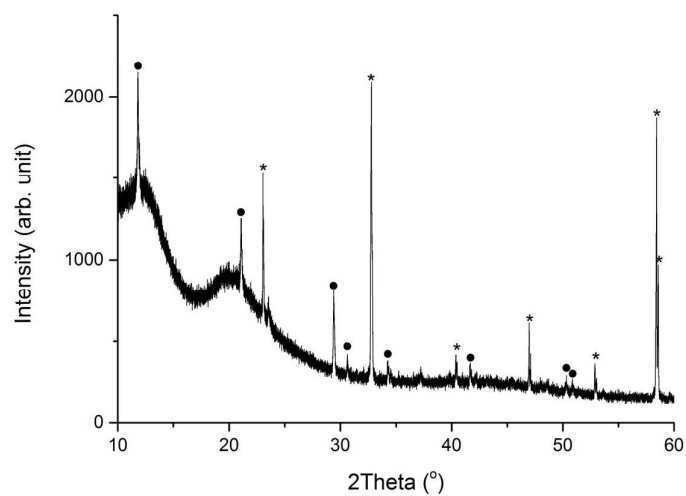

**Figure S6.** XRD powder pattern recorded from a P123/DEHP/calcium phosphate organogel mounted on a glass slide at room temperature under humid conditions, and left for 5 days. Reflections corresponding to crystalline brushite (asterisks) and hydroxyapatite (closed circles), along with an amorphous phase are observed.
